# Supplementary material for: Inventory Theory
Source: Atypon-hosted journal article supplement (doi:10.1287/opre.50.1.186.17773), 2002-02-01
Supplement: opre.50.1.186-sm.pdf [file opre.50.1.186-sm.pdf]

Online Companion for

**Inventory Theory**

Operations Research  
Volume 50, Number 1, January-February 2002

**Herbert E. Scarf**

**informs**

***HERBERT E. SCARF***

PERSONAL

Date of Birth: July 25, 1930 (Philadelphia, PA)  
Marital Status: Married  
Citizenship: U. S. A.  
Current Position and Business Address: Sterling Professor of Economics  
Cowles Foundation, Yale University  
PO Box 208281  
New Haven, Connecticut 06520-8281  
(203) 432-3693  
Home Address: 88 Blake Road  
Hamden, Connecticut 06517  
(203) 776-9197

EDUCATION

A.B. 1951 Temple University  
M.A. 1952 Princeton University  
Ph.D. 1954 Princeton University, in Mathematics

POSITIONS

1954-57 The Rand Corporation, Santa Monica, California  
1957-63 Assistant and Associate Professor, Department of Statistics,  
Stanford University, Stanford, California  
1959-60 Visiting Associate Professor, Cowles Foundation, Yale University  
1962-63 Fellow, Center for Advanced Study in the Behavioral Sciences, Stanford,  
California  
1963-70 Professor of Economics, Yale University  
1970-78 Stanley Resor Professor of Economics, Yale University  
1979- Sterling Professor of Economics, Yale University  
1967-71 Director, Cowles Foundation for Research in Economics, Yale University  
1981-84 Director, Cowles Foundation for Research in Economics, Yale University  
1971-72 Director, Division of Social Sciences, Yale University  
1973-74 Director, Division of Social Sciences, Yale University  
1977-78 Visiting Professor, Stanford University, Stanford, CA  
1983 President, Econometric Society  
1986 Research Scholar, Mathematical Sciences Research Institute, Berkeley, California  
1991-94 Chairman, Section of Economic Sciences, National Academy of Sciences

## AWARDS, FELLOWSHIPS, MEMBERSHIPS

- 1947 First Place, Temple University Mathematics Tournament  
(Pennsylvania statewide tournament for high school students)
- 1950 In first 10, Putnam Mathematics Tournament
- 1952 J. S. K. Fellow, Princeton University
- 1952-53 Fellow, National Science Foundation, Princeton University
- 1953 Proctor Fellow, Princeton University
- 1963 Fellow, Econometric Society
- 1969-70 Senior Faculty Fellowship, Ford Foundation
- 1971 Fellow, American Academy of Arts and Sciences
- 1974 Lanchester Prize, Operations Research Society of America
- 1976 Member, National Academy of Sciences
- 1978 L.H.D., honoris causa, University of Chicago
- 1983 von Neumann Medal, Operations Research Society of America
- 1991 Distinguished Fellow, American Economic Association
- 1993 Member, American Philosophical Society

## PUBLICATIONS

"Group Invariant Integration and the Fundamental Theorem of Algebra." In Proceedings, National Academy of Sciences, May, 1952.

"Shaped Sources for Teletherapy Units," (with W. Pollard), *Nucleonics*, February, 1953.

"On Differential Games with Survival Payoffs," and "Games with Partial Information," (with L. Shapley). In Volume III, Contributions to the Theory of Games, eds. M. Dresher, A.W. Tucker and P. Wolfe, in the series Annals of Mathematical Studies, eds. E. Artin and M. Morse. Princeton University Press, 1957.

"The Nature and Structure of Inventory Problems," (with K.J. Arrow and S. Karlin); "Summaries," (with K.J. Arrow and S. Karlin); "Inventory Models of the Arrow-Harris-Marschak Type with Time Lag," (with S. Karlin); "A Min-Max Solution of an Inventory Problem;" "Stationary Operating Characteristics of an Inventory Model with Time Lag;" and "Inventory Models and Related Stochastic Processes" (with S. Karlin). In Studies in the Mathematical Theory of Inventory and Production, eds. K.J. Arrow, S. Karlin and H.E. Scarf. Stanford University Press, 1958.

"A Dynamic Theory of Consumers' Preferences," Technical Report, Statistics Department, Stanford University, 1958.

"Bayes Solutions of the Statistical Inventory Problem," *Annals of Mathematical Statistics*, Vol. 30, No. 2, 1959.

"Some Examples of Global Instability of the Competitive Equilibrium," *International Economic Review*, Vol. 1, 1960.

"The Optimality of (S, s) Policies in the Dynamic Inventory Problem." In Mathematical Methods in the Social Sciences 1959. Proceedings of the First Stanford Symposium. Stanford University Press, 1959. Also in Optimal Pricing, Inflation, and the Cost of Price Adjustment, eds., E. Sheshinski and Y. Weiss. Cambridge, MA: MIT Press, 1993.

"Optimal Policies for a Multi-echelon Inventory Problem," (with A. J. Clark), *Management Science*, Vol. 6, No. 4, 1960.

"Approximate Solutions to a Simple Multi-Echelon Inventory Problem" (with A.J. Clark). In Studies in Applied Probability and Management Science, eds. K.J. Arrow, S. Karlin, and H. E. Scarf. Stanford University Press, 1962.

"An Analysis of Markets with a Large Number of Participants." Princeton University Conference Paper. In Recent Advances in Game Theory. Philadelphia: The Ivy Curtis Press, 1962.

"A Survey of Analytic Techniques in Inventory Theory." In Multistage Inventory Models and Techniques, eds. H.E. Scarf, D. M. Gilford and M. W. Shelley. Stanford University Press, 1963.

"A Limit Theorem on the Core of an Economy," (with G. Debreu), *International Economic Review*, Vol. 4, No. 3, 1963. Reprinted in Classics in Game Theory, ed. H. Kuhn. Princeton University Press, 1997. Reprinted in Economic Games, Bargaining and Solutions, ed. O.F. Hamouda and J.C.R. Rowley, Foundations of Probability, Econometrics and Economic Games series, series no. 3, Edward Elgar Publishing, 1997.

"An Algorithm for a Class of Nonconvex Programming Problems," Cowles Foundation Discussion Paper, No. 211, July, 1966.

"The Core of an N-Person Game," *Econometrica*, Vol. 35, No. 1, 1967. Reprinted in Classics in Game Theory, ed. H. Kuhn. Princeton University Press, 1997. Reprinted in Economic Games, Bargaining and Solutions, ed. O.F. Hamouda and J.C. R. Rowley, Foundations of Probability Econometrics and Economic Games series, series no. 3, Edward Elgar Publishing, 1997.

"The Approximation of Fixed Points of a Continuous Mapping," *SIAM Journal of Applied Mathematics*, Vol. 15, No. 5, 1967.

"On the Computation of Equilibrium Prices." In Ten Economic Studies in the Tradition of Irving Fisher. New York: John Wiley & Sons, 1967.

"On the Existence of Cooperative Solutions to a Class of N-Person Games." In Indirect Measurement of Utility, U.S. Arms Control and Disarmament Agency (ACDA), November 1968. Also in Game-Theoretic Models of Cooperation & Conflict, eds. J.P. Mayberry, et al. Underground Classics in Economics Series. Boulder, CO: Westview Press, 1992.

"An Example of an Algorithm for Calculating General Equilibrium Prices," *The American Economic Review*, Vol. 59, No. 4, 1969.

"On the Application of a Recent Combinatorial Algorithm," (with T. Hansen), Cowles Foundation Discussion Paper, No. 272, April, 1969

"On the Existence of a Cooperative Solution for a General Class of N-Person Games," *Journal of Economic Theory*, Vol. 3, No. 2, 1971.

"The Limit of the Core of an Economy" (with G. Debreu). In Decision and Organization, Amsterdam: North-Holland, 1972.

The Computation of Economic Equilibria (with collaboration of T. Hansen), Cowles Foundation Monograph No. 24. New Haven: Yale University Press, 1973.

"On Cores and Indivisibility," (with L. Shapley), *Journal of Mathematical Economics*, Vol. 1, No. 1, 1974. Also in Studies in Mathematics, eds. G. B. Dantzig and B. C. Eaves. The Mathematical Association of America, Vol. 10, 1974.

"The 1975 Nobel Prize in Economics: Resource Allocation," *Science Magazine*, Vol. 190, November, 1975.

"The Solution of Systems of Piecewise Linear Equations," (with B. C. Eaves), *Mathematics of Operations Research*, Vol. 1, No. 1, 1976.

"An Observation on the Structure of Production Sets with Indivisibilities," Proceedings, National Academy of Sciences, Vol. 74, No. 9, 1977.

"Production Sets with Indivisibilities, Part I: Generalities," *Econometrica*, Vol. 49, No. 1, 1981.

"Production Sets with Indivisibilities, Part II: The Case of Two Activities," *Econometrica*, Vol. 49, No. 2, 1981.

"Comment on: 'On the Stability of Competitive Equilibrium and the Patterns of Initial Holdings: An Example,'" *International Economic Review*, Vol. 22, No. 2, 1981.

"The Computation of Equilibrium Prices: An Exposition." In Handbook of Mathematical Economics, Volume II, eds. K. Arrow and M., ed. Alan Kirman, chapter 4, Forthcoming.

"Fixed Point Theorems and Economic Analysis," *American Scientist*, May, 1983.

Applied General Equilibrium Analysis, eds. H.E. Scarf and J. Shoven. Cambridge University Press, 1984.

"Integral Polyhedra in Three Space," *Mathematics of Operations Research*, Vol. 10, No. 3, 1985.

"Neighborhood Systems for Production Sets with Indivisibilities," *Econometrica*, Vol. 54, No. 3, 1986.

"Testing for Optimality in the Absence of Convexity." In Social Choice and Public Decision Making: Essays in Honor of Kenneth J. Arrow, Volume 1, eds. W. Heller, R. Starr and D. Starrett. Cambridge University Press, 1986.

"Notes on the Core of a Productive Economy." In Contributions to Mathematical Economics (in Honor of Gerard Debreu), eds. W. Hildenbrand and A. Mas-Colell. Amsterdam: North-Holland, 1986.

"A Theorem in Search of a Simple Proof." In Probability, Statistics, and Mathematics, Papers in Honor of Samuel Karlin, eds. T.W. Anderson, K.B. Athreya, and D.L. Iglehart. Academic Press, Inc., 1989.

"A Computation of General Equilibrium." In General Equilibrium, eds. John Eatwell, Murray Milgate, Peter Newman, The New Palgrave: A Dictionary of Economics, London: The Macmillan Press Ltd, 1989, pp. 84-97.

"The Shapes of Polyhedra," (with R. Kannan and L. Lovász), *Mathematics of Operations Research*, Vol. 15, No. 2, 1990.

"Mathematical Programming and Economic Theory," *Operations Research*, Vol. 38, No. 3, 1990.

"Economic Equilibrium and Soviet Economic Reform," *Cowles Foundation Discussion Paper*, No. 969, February, 1991.

"The Origins of Fixed Point Methods." In *History of Mathematical Programming, A Collection of Personal Reminiscences*, eds. J.K. Lenstra, A.H.G. Rinnooy Kan and A. Schrijver. Amsterdam: North-Holland, 1991.

"The Generalized Basis Reduction Algorithm," (with L. Lovász), *Mathematics of Operations Research*, Vol. 17, No. 3, 1992.

"Tjalling Charles Koopmans (August 28, 1910 - February 26, 1985)." In *Biographical Memoirs*, Volume 67, pp. 263-291. National Academy Press, 1995.

"An Implementation of the Generalized Basis Reduction Algorithm for Integer Programming" (with W. Cook, T. Rutherford, and D.F. Shallcross), *ORSA Journal on Computing*, Vol. 5, No. 2, 1993.

"The Frobenius Problem and Maximal Lattice Free Bodies," (with D.F. Shallcross), *Mathematics of Operations Research*, Vol. 18, No. 3, 1993.

"Shortest Integer Vectors," (with D.F. Shallcross), *Mathematics of Operations Research*, Vol. 18, No. 3, 1993.

"The Complex of Maximal Lattice Free Simplices," (with I. Bárány and R. Howe), *Mathematical Programming*, Vol. 66, No. 3, 1994.

"The Allocation of Resources in the Presence of Indivisibilities," *Journal of Economic Perspectives* Vol.8, No. 4, 1994. Reprinted in *Readings in Microeconomic Theory*, ed. Manfredi M.A. LaManna The Dryden Press, Harcourt Brace & Company, 1997.

Foreward to *Applied General Equilibrium and Economic Development*, edited by J. Mercenier and T.N. Srinivasan. Ann Arbor: The University of Michigan Press, 1994.

"Matrices with Identical Sets of Neighbors," (with I. Bárány), *Cowles Foundation Discussion Paper* No. 1127, May 1996. Submitted to *Mathematics of Operations Research*.

"Test Sets for Integer Programs," *Mathematical Programming*, volume 79, 1997, pp. 355-368.

"The Topological Structure of Maximal Lattice Free Convex Bodies: The General Case," (with I. Bárány and D. Shallcross), *Mathematical Programming*, vol.80, no.1, January 1998, pp. 1-15.

"Optimal Inventory Policies When Sales are Discretionary", CFDP #1270, August 2000.

"How to Compute Equilibrium Prices in 1891", (with William C. Brainard), CFDP #1272, August 2000.
